# Supplementary figures and images for: Fibrosis and cardiac function in obesity: a randomised controlled trial of aldosterone blockade
Source: HighWire-hosted journal article supplement (doi:10.1136/heartjnl-2012-303329), 2013-01-23

## Study flow diagram

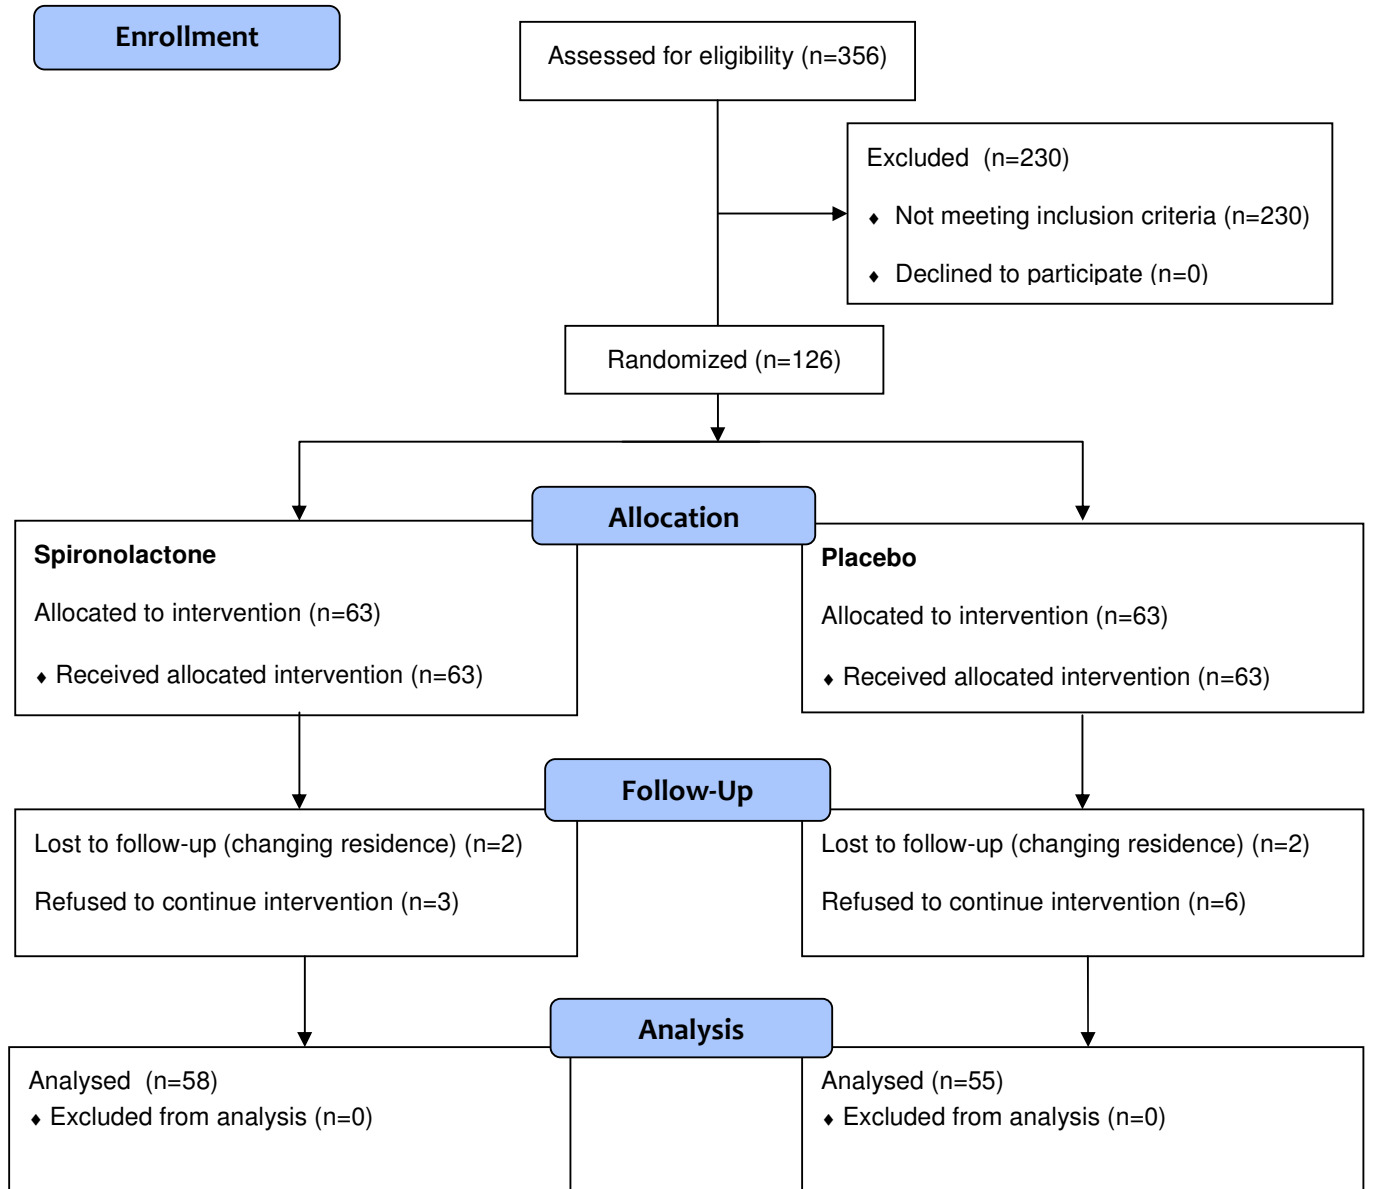

Supplement: heartjnl-2012-303329supp_figure.pdf [file heartjnl-2012-303329supp_figure.pdf]
